# Supplementary material
Source: PubMed Central journal article supplement (PMC4132641)
Supplement: NIHMS607607-supplement-Supp_Material.pdf [file NIHMS607607-supplement-Supp_Material.pdf]

### Supplementary Figure 1

**Copper binding activity of SufA in *E. coli* cells.** **A)** UV-visible absorption spectra of recombinant SufA purified from the *E. coli copA/cueO/cusA* mutant cells grown in LB media supplemented with 0, 100, 200, 500, and 1000  $\mu\text{M}$   $\text{CuSO}_4$ . **B)** relative copper binding activity of SufA expressed in the *E. coli* cells. The copper content in purified SufA from A) was analyzed and plotted as a function of the  $\text{CuSO}_4$  concentrations in LB media.

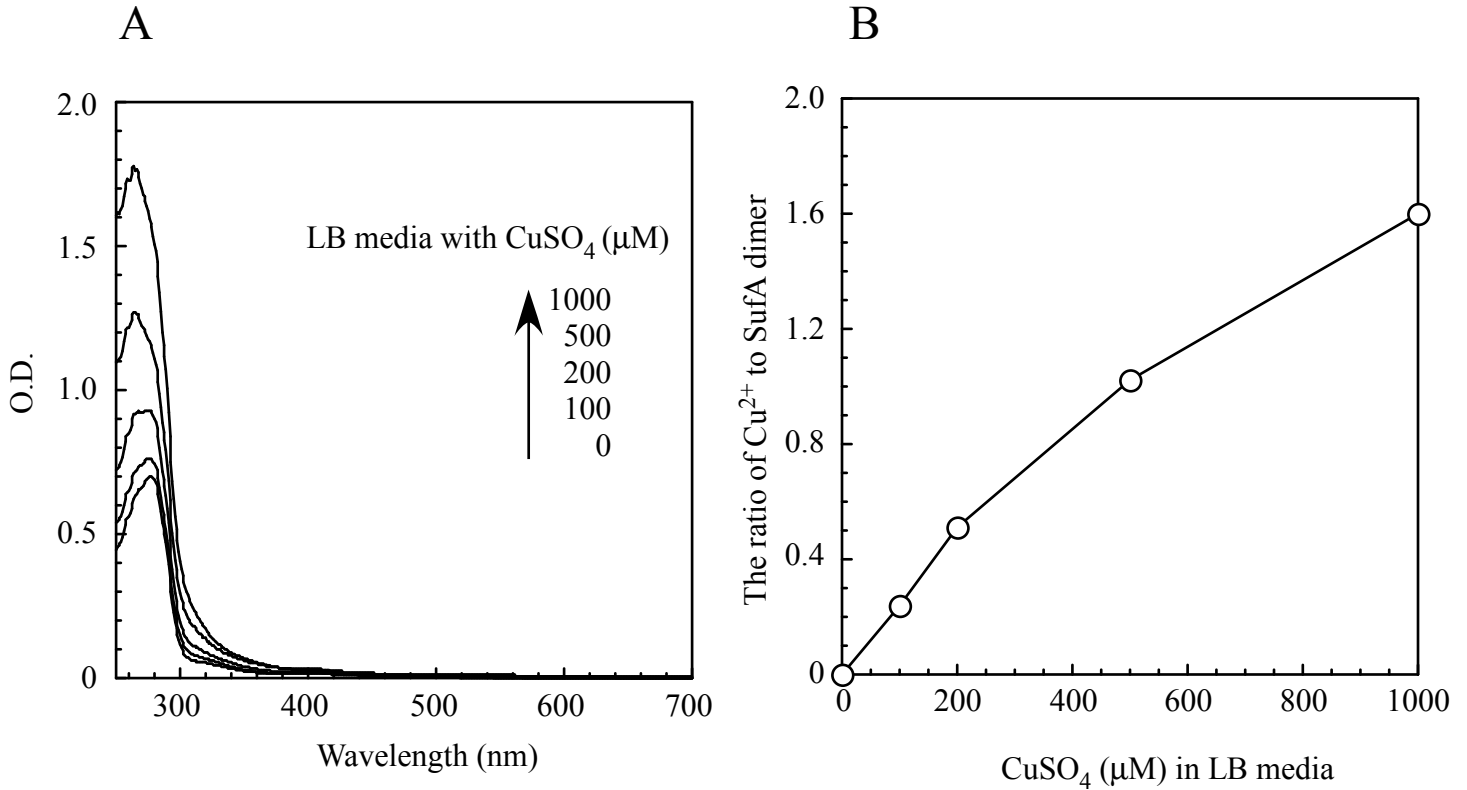

## Supplementary Figure 2

**Activation of *sufA::lacZ* operon by copper in *E. coli* cells.** An *E. coli* strain SJ172 (MG1655 (*lacZ1::cat*)1 with *attλ::[pSJ501::sufA'-lac+]~cat*) (Jang & Imlay, 2010) was used for analyses of the activation of *sufA* promoter by copper. Overnight *E. coli* cells were diluted 1:100 in fresh LB media supplemented with the indicated concentrations of  $\text{CuSO}_4$ . Cells were grown at 37°C for 2 hours, and  $\beta$ -galactosidase was assayed using o-nitrophenyl- $\beta$ -D-galactopyranoside (ONPG) as a substrate (Miller, 1972). **A)**, cell growth in LB media with indicated concentrations of  $\text{CuSO}_4$ . **B)**, the  $\beta$ -galactosidase activity was plotted as a function of  $\text{CuSO}_4$  concentrations in LB media. The results are the averages plus standard deviations from three experiments.

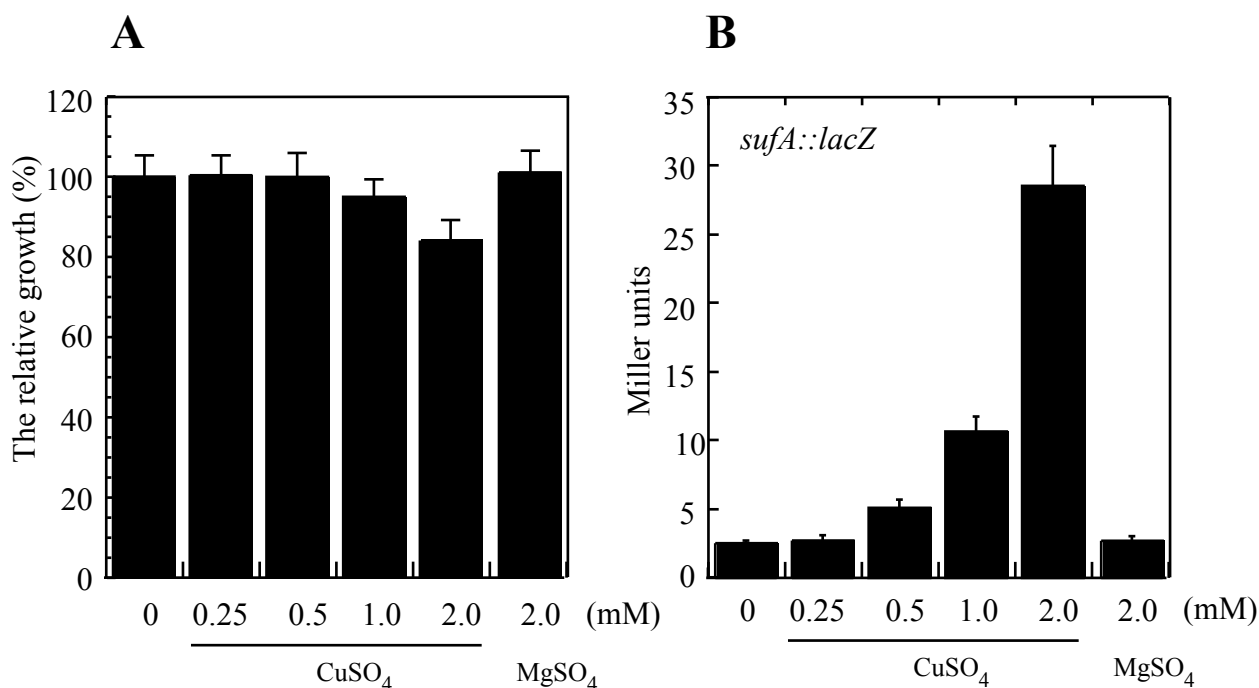

### References:

Jang, S. & J.A. Imlay, (2010) Hydrogen peroxide inactivates the *Escherichia coli* Isc iron-sulphur assembly system, and OxyR induces the Suf system to compensate. *Molecular Microbiology* 78: 1448-1467.

Miller, J.H., (1972) *Experiments in Molecular Genetics*. Cold Spring Harbor Laboratory, Cold Spring Harbor, NY.
